# Supplementary material
Source: PubMed Central journal article supplement (PMC2871951)
Supplement: NIHMS198237-supplement-1_si_001.pdf [file NIHMS198237-supplement-1_si_001.pdf]

# Metallosupramolecular Tetragonal Prisms via Multicomponent Coordination-Driven Template Free Self-Assembly

Ming Wang,\* Yao-Rong Zheng, Koushik Ghosh and Peter J. Stang\*

*Department of Chemistry, University of Utah, 315 South 1400 East, RM 2020,  
Salt Lake City, Utah 84112*

Email: [stang@chem.utah.edu](mailto:stang@chem.utah.edu)

|                                                                                                  |    |
|--------------------------------------------------------------------------------------------------|----|
| 1. Experimental Section .....                                                                    | S2 |
| 2. $^1\text{H}$ NMR and $^{13}\text{C}$ NMR of donor <b>1</b> .....                              | S4 |
| 3. $^{31}\text{P}\{^1\text{H}\}$ NMR of tetragonal prism <b>4b</b> and acceptor <b>3</b> .....   | S5 |
| 4. Strength-dependent $^{31}\text{P}\{^1\text{H}\}$ NMR spectra of <b>4a</b> and <b>4b</b> ..... | S5 |
| 5. Temperature-dependent $^{31}\text{P}\{^1\text{H}\}$ NMR spectra of <b>4a</b> .....            | S6 |
| 6. $^1\text{H}$ NMR of tetragonal prism <b>4a</b> and donor <b>1</b> and <b>2a</b> mixture ..... | S6 |
| 7. $^1\text{H}$ NMR of tetragonal prism <b>4b</b> and donor <b>1</b> and <b>2b</b> mixture ..... | S7 |
| 8. Theoretical and experimental of HR-ESI-MS result for tetragonal prism <b>4b</b> .....         | S8 |
| 9. Computational model of tetragonal prism <b>4b</b> .....                                       | S8 |
| 10. Low resolution ESI-MS for <b>4a</b> and <b>4b</b> .....                                      | S8 |
| 11. PGSE NMR data for <b>4a</b> and <b>4b</b> .....                                              | S9 |

## Experimental Section

**Methods and Materials:** Tetra-(4-bromophenyl)ethylene was synthesized by McMurry coupling of 1, 4-bromophenone according to reported method,<sup>1</sup> the Suzuki coupling reaction between tetra-(4-bromophenyl)ethylene and pyridine 4-boronic acid afford donor **1**<sup>2</sup>. Deuterated solvents were purchased from Cambridge Isotope Laboratory (Andover, MA). NMR spectra were recorded on a Varian Unity 300 spectrometer. The <sup>1</sup>H NMR chemical shifts are reported relative to residual solvent signals, and <sup>31</sup>P{<sup>1</sup>H} NMR resonances are referenced to an external unlocked sample of 85% H<sub>3</sub>PO<sub>4</sub> (δ 0.0). Mass spectra for the tetragonal prism **4a** and **4b** were recorded on a Micromass Quattro II triple-quadrupole mass spectrometer using electrospray ionization with a MassLynx operating system.

### Synthesis of tetra-(4-pyridylphenyl)ethylene **1**:

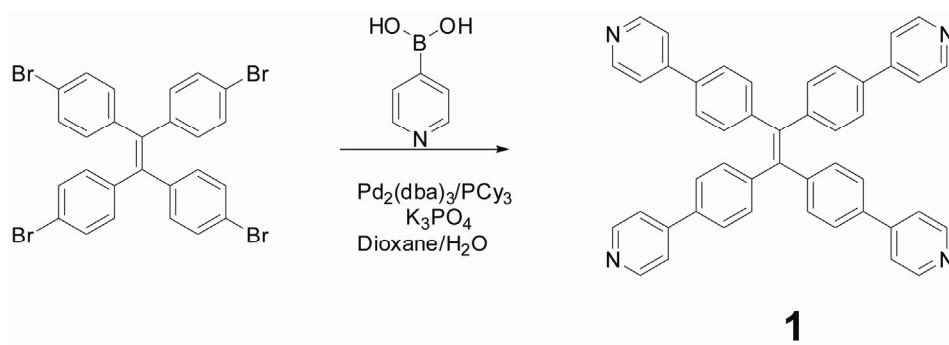

To 50 mL schlenk bottle was added tetra-(4-bromo-phenyl)ethylene 161.0 mg (0.25 mmol), pyridine-4-boronic acid 246.0 mg(2.0 mmol), Pd<sub>2</sub>(dba)<sub>3</sub> (40.0 mg) and PCy<sub>3</sub> (25.0) mg, then dioxane (8.0 mL) and K<sub>3</sub>PO<sub>4</sub> aqueous solution(3.0 mmol) was added under nitrogen atmosphere at room temperature, the mixture solution was kept at 100 °C for 3 days. After cooling to room temperature, the reaction solution was

extracted with dichloromethane for three times, combine the organic phase and washed with water, dry with anhydrous magnesium sulfate and then subject to flash chromatography using(dichloromethane/ methanol, v : v = 10 : 1 as fluent). The product tetra-(4-pyridylphenyl)ethylene obtained as green-yellow solid. Yield: 40%.  $^1\text{H}$  NMR ( $\text{CDCl}_3$ , 300 MHz, 298 K):  $\delta$  8.65 (br, 8H,  $\text{H}_\alpha\text{-Py}$ ), 7.45-7.50 (m, 20H, ArH), 7.22(br, 8H,  $\text{H}_\beta\text{-Py}$ );  $^{13}\text{C}$  NMR (75 MHz,  $\text{CDCl}_3$ )  $\delta$  150.5, 147.6, 144.2, 140.9, 136.7, 132.4, 126.8, 121.5. HR-TOF-MS: Found, 641.2717 (M+H); Anal., 641.2705.

**Synthesis of tetragonal prism 4a:** The  $\text{CD}_2\text{Cl}_2$  solution (0.6 mL) of Tetra-(4-pyridyl-phenyl)ethylene **1** (0.67 mg, 1.05  $\mu\text{mol}$ ) and 4, 4'- dipyridine **2a** (0.33 mg, 2.1  $\mu\text{mol}$ ) was added to the  $\text{CD}_3\text{NO}_2$  solution of **3** (3.05 mg, 4.2 $\mu\text{mol}$ ) dropwisely, the mixture were kept at room temperature for 12 h and then transferred into NMR tubes for analysis or ESI-MS characterization.  $^{31}\text{P}\{^1\text{H}\}$  NMR( $\text{CD}_2\text{Cl}_2/\text{CD}_3\text{NO}_2$ , 2 : 1, 121.4MHz)  $\delta$  = -0.7 ppm( $^{195}\text{Pt}$  satellites,  $^1\text{J}_{\text{Pt-P}}$ : 3156 Hz);  $^1\text{H}$  NMR ( $\text{CD}_2\text{Cl}_2/\text{CD}_3\text{NO}_2$ , 2 : 1, 300 MHz, 298 K):  $\delta$  = 8.93 (d, 16H,  $\text{H}_\alpha\text{-Py}$  for donor **1**), 8.72 (d, 16H,  $\text{H}_\alpha\text{-Py}$  for donor **2**), 8.05 (d, 16H,  $\text{H}_\beta\text{-Py}$  for donor **2**), 7.73 (d, 16H,  $\text{H}_\beta\text{-Py}$  for donor **1**), 7.10-7.40(dd, 32H, ArH), 1.36-1.37 (m, 96H,  $\text{PCH}_2\text{CH}_3$ ), 1.10-1.20 (m, 144H,  $\text{PCH}_2\text{CH}_3$ ); MS (ESI) for **4a** ( $\text{C}_{244}\text{H}_{336}\text{F}_{48}\text{N}_{16}\text{O}_{48}\text{P}_{16}\text{Pt}_8\text{S}_{16}$ ): m/z: 1786.1  $[\text{M}-4\text{OTf}]^{4+}$ ; 1399.3  $[\text{M}-5\text{OTf}]^{5+}$ .

**Synthesis of tetragonal prism 4b:** The  $\text{CD}_2\text{Cl}_2$  solution (0.6 mL) of Tetra-(4-pyridyl-phenyl)ethylene **1** (0.87 mg, 1.35  $\mu\text{mol}$ ) and *trans*-1, 2-Di(4-pyridyl)ethylene **2b** (0.51 mg, 2.7  $\mu\text{mol}$ ) was added to the  $\text{CD}_3\text{NO}_2$  solution of **3** (3.96 mg, 5.4 $\mu\text{mol}$ ) dropwisely, the mixture were kept at room temperature for 12 h and then transferred into NMR

tubes for analysis or ESI-MS characterization.  $^{31}\text{P}\{^1\text{H}\}$  NMR( $\text{CD}_2\text{Cl}_2/\text{CD}_3\text{NO}_2$ , 2 : 1, 121.4MHz)  $\delta = -0.6$  ppm ( $^{195}\text{Pt}$  satellites,  $^1J_{\text{Pt-P}}$ : 3071 Hz);  $^1\text{H}$  NMR ( $\text{CD}_2\text{Cl}_2/\text{CD}_3\text{NO}_2$ , 300 MHz, 298 K):  $\delta$  8.77 (d, 16H,  $\text{H}_\alpha\text{-Py}$  for donor **1**), 8.70 (d, 16H,  $\text{H}_\alpha\text{-Py}$  for donor **2**), 7.69 (d, 16H,  $\text{H}_\beta\text{-Py}$  for donor **2b**), 7.67 (d, 16H,  $\text{H}_\beta\text{-Py}$  for donor **1**), 7.10-7.15, 7.40-7.49 (dd, 32H, ArH), 7.30(s, 8H, for the ethylene at donor **2b**), 1.36-1.37 (m, 96H,  $\text{PCH}_2\text{CH}_3$ ), 1.10-1.20 (m, 144H,  $\text{PCH}_2\text{CH}_3$ ); MS (ESI) for **4b** ( $\text{C}_{252}\text{H}_{344}\text{F}_{48}\text{N}_{16}\text{O}_{48}\text{P}_{16}\text{Pt}_8\text{S}_{16}$ ): m/z: 1420.1  $[\text{M}-5\text{OTf}]^{5+}$ .

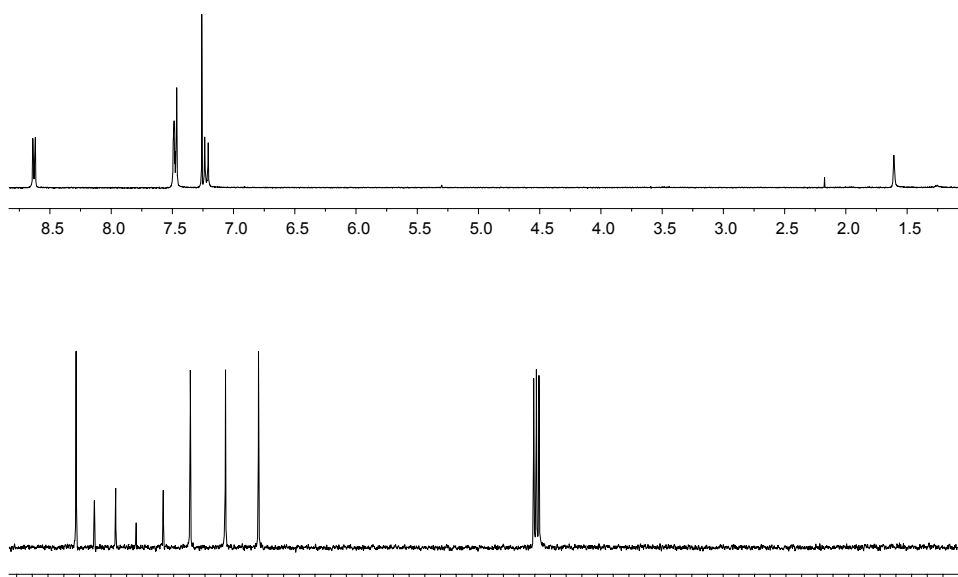

Figure S1  $^1\text{H}$  NMR( $\text{CDCl}_3$ , 300 MHz, 298 K) and  $^{13}\text{C}$  NMR ( $\text{CDCl}_3$ , 75 MHz, 298 K) of donor **1**

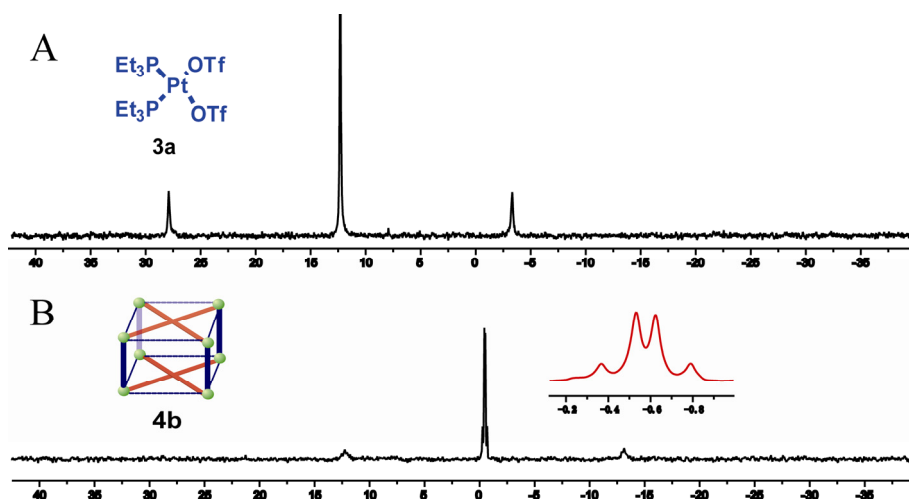

Figure S2 The  $^{31}\text{P}\{^1\text{H}\}$  NMR spectra (121.4 MHz, 298K,  $\text{CD}_2\text{Cl}_2/\text{CD}_3\text{NO}_2$  v : v = 2 : 1) of acceptor **3** (A) and tetragonal prism **4b** (B)

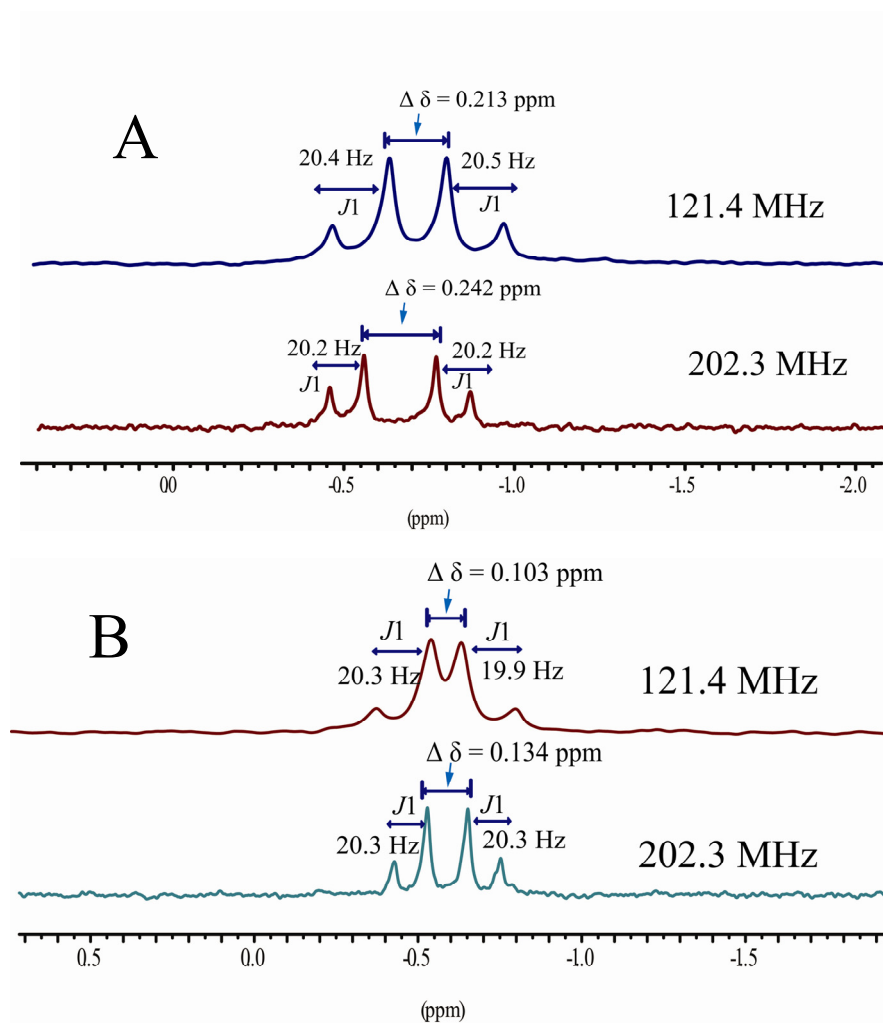

Figure S3 Strength-dependent  $^{31}\text{P}\{^1\text{H}\}$  NMR spectra (299K,  $\text{CD}_2\text{Cl}_2/\text{CD}_3\text{NO}_2$  v : v = 2 : 1) of **4a** (A) and **4b**(B). *up*: 121.4 MHz; *down*: 202.3 MHz

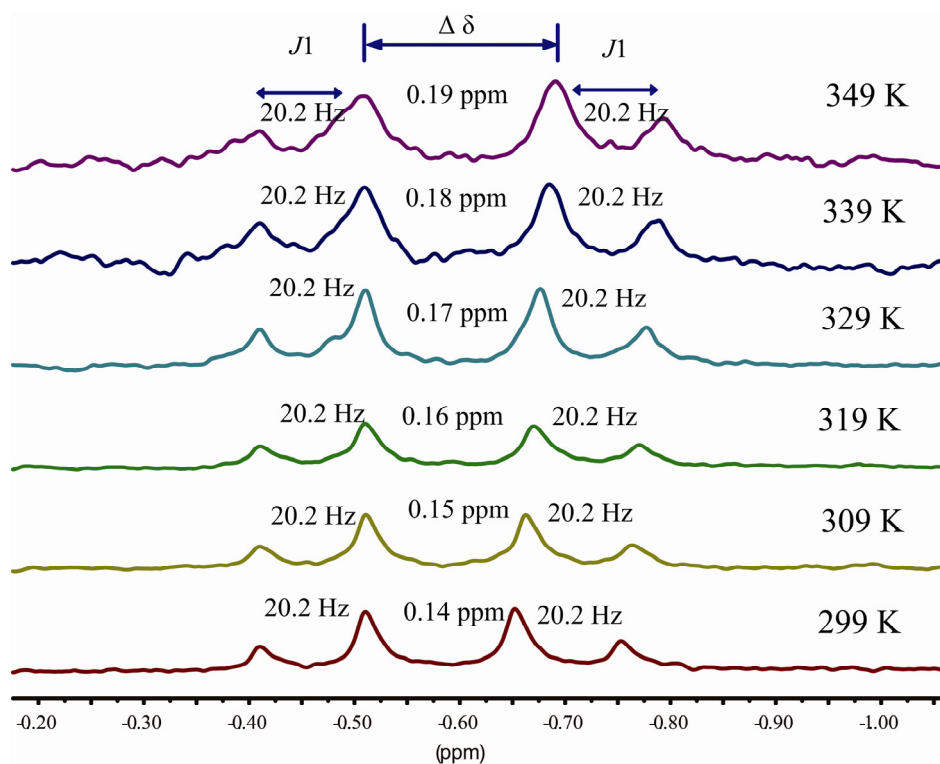

Figure S4 Temperature-dependent  $^{31}\text{P}\{^1\text{H}\}$  NMR spectra (202.3 MHz, 299K,  $\text{CD}_3\text{CN}$ )

of **4a**

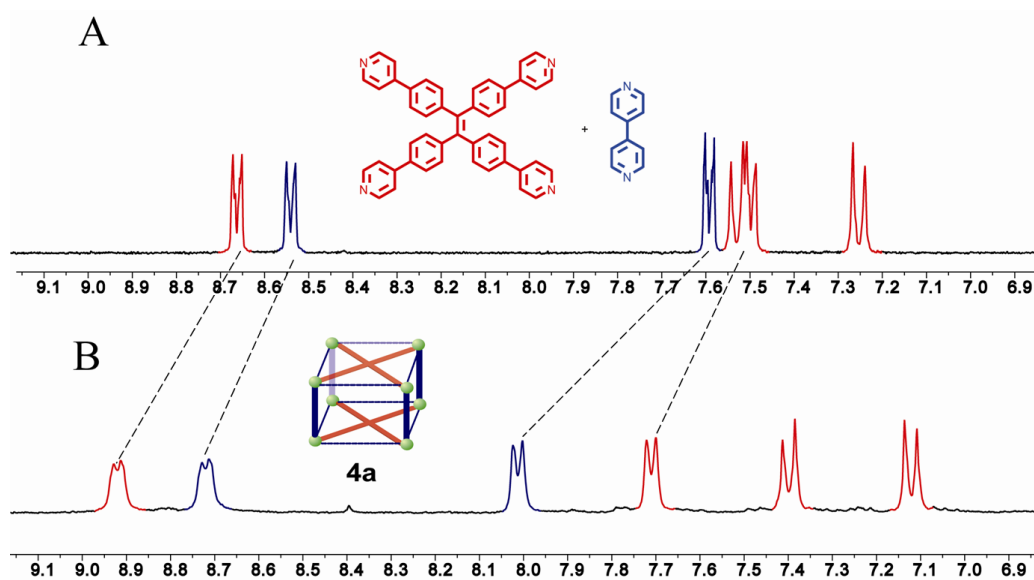

Figure S5 Partial  $^1\text{H}$  NMR (300 MHz, 298 K) of donor **1** and **2a** mixture (A) and tetragonal prism **4a** (B) in  $\text{CD}_2\text{Cl}_2/\text{CD}_3\text{NO}_2$  ( $v : v = 2 : 1$ )

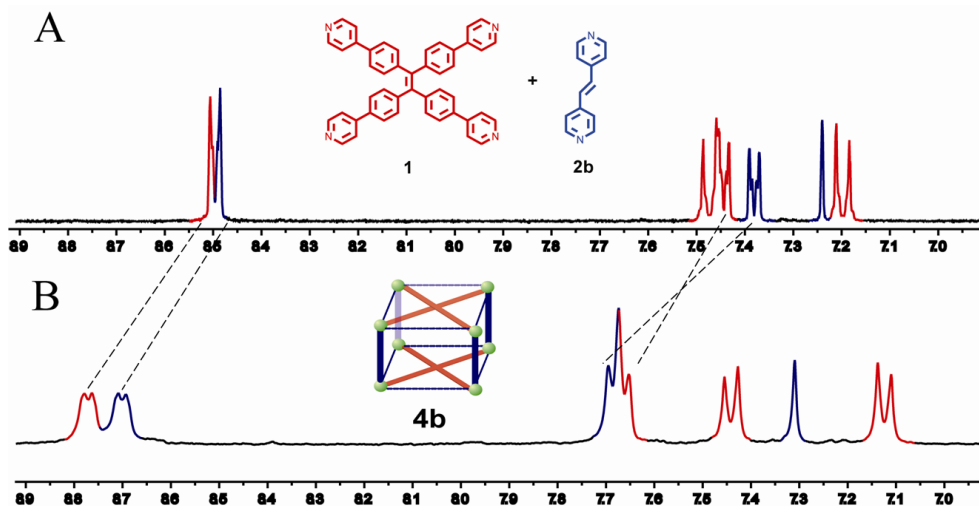

Figure S6 Partial  $^1\text{H}$  NMR (300 MHz, 298 K) of donor **1** and **2b** mixture (A) and tetragonal prism **4b** (B) in  $\text{CD}_2\text{Cl}_2/\text{CD}_3\text{NO}_2$  (v : v = 2 : 1)

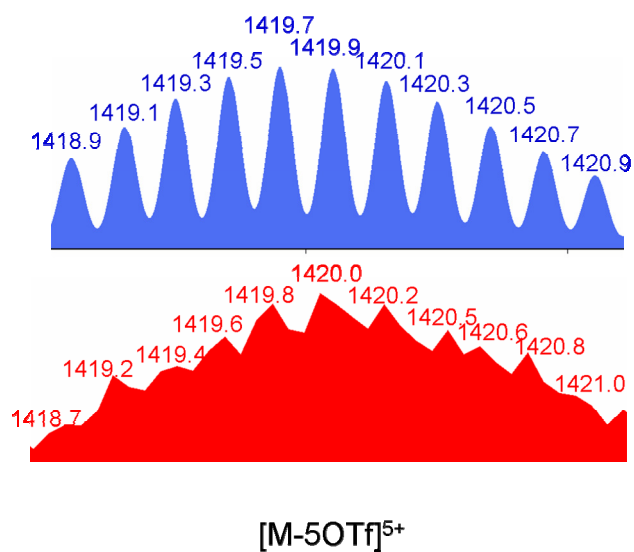

Figure S7 Theoretical (top, blue) and experimental (bottom, red) of ESI-MS results for tetragonal prism **4b**

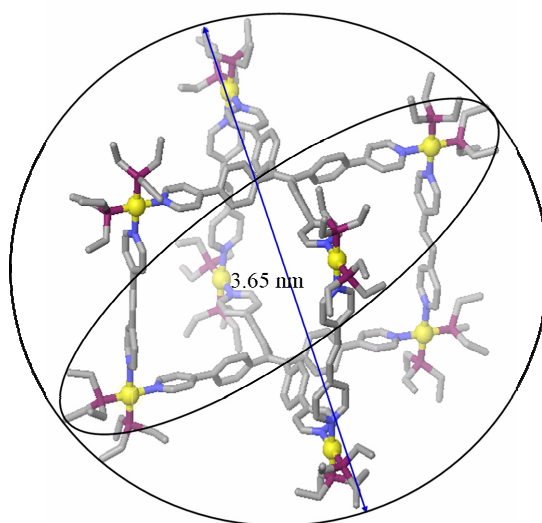

Figure S8 Molecular modeling of tetragonal prism **4b**

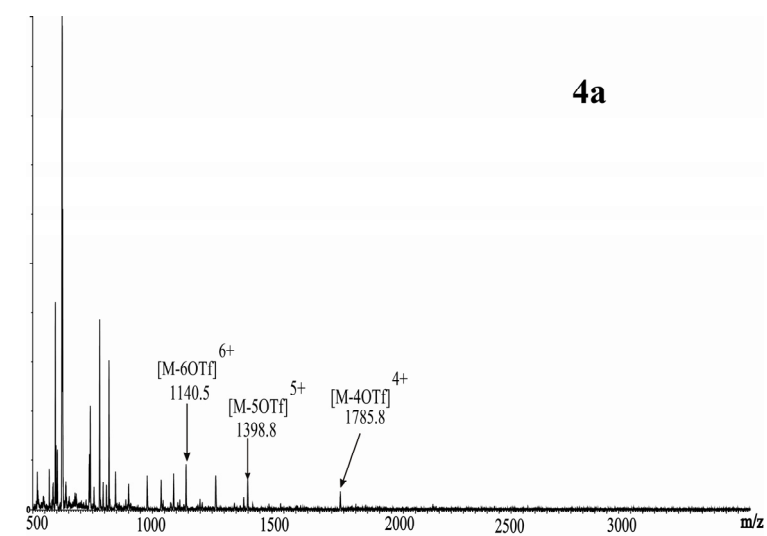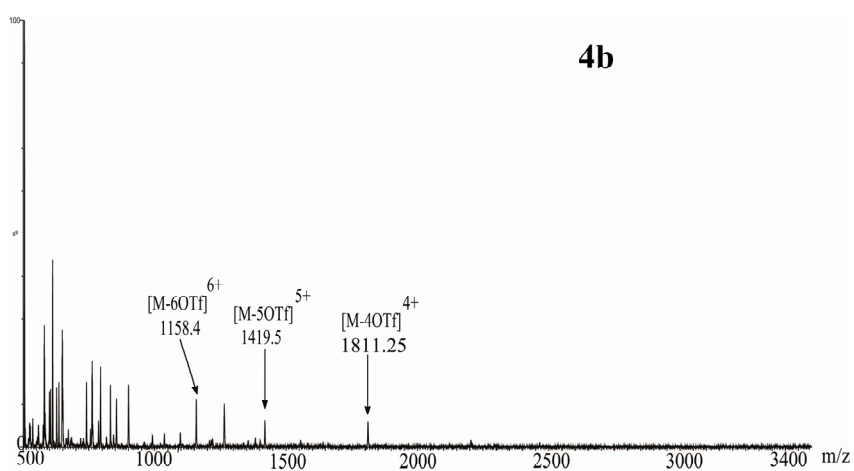

Figure S9 Low Resolution EST-MS of tetragonal prisms **4a** and **4b**



Table S1: Calculation of diffusion coefficient by PGSE measurement

| Compound  | Diffusion Coefficient ( $10^{-6}\text{cm}^2/\text{s}$ ) |
|-----------|---------------------------------------------------------|
| <b>4a</b> | ( $2.65 \pm 0.12$ )                                     |
| <b>4b</b> | ( $2.63 \pm 0.12$ )                                     |

PGSE measurements were carried out in  $\text{CD}_3\text{CN}$  solvent at 298K. The ratio of the diffusion coefficient is proportional to the inverse of their radius of the molecule (Stokes-Einstein Equation).

## Reference

1. Duan, X - F.; Zeng, J.; Lv, J - W.; Zhang, Z - B. *J. Org.Chem.* **2006**, *71*, 9873-9876.
2. Kudu, N.; Perseghini, M.; Fu, G. C. *Angew. Chem. Int. Ed.* **2006**, *45*, 1282 – 1284.
